# Supplementary material for: Microencapsulated Bilberry and Chokeberry Leaf Extracts with Potential Health Benefits
Source: MDPI journal article supplement (doi:10.3390/plants12233979), 2023-11-27
Supplement: s1 [file s1]

## Supplementary material

**Table S1.** Minimum bactericidal concentration (MBC) and minimum fungicidal concentration (MFC) of bilberry and chokeberry leaves extracts and their microencapsulates on foodborne and skin bacteria.

|           |                         | Samples         |     |      |     |      |      |
|-----------|-------------------------|-----------------|-----|------|-----|------|------|
|           |                         | MBC/MFC (mg/mL) |     |      |     |      |      |
|           | Microorganism           | B               | BP  | BPCD | C   | CP   | CPCD |
| foodborne | <i>E. faecalis</i>      | 5               | 5   | 5    | 15  | 15   | 15   |
|           | <i>L. monocytogenes</i> | 40              | 80  | 60   | >80 | 80   | 80   |
|           | <i>E. coli</i>          | 40              | 80  | 60   | >80 | >80  | 80   |
|           | <i>S. Typhimurium</i>   | 80              | >80 | >80  | >80 | >80  | >80  |
|           | <i>S. flexneri</i>      | 7.5             | 10  | 10   | 40  | 60   | 50   |
| skin      | <i>S. aureus</i>        | 2.5             | 5   | 5    | 7.5 | 12.5 | 7.5  |
|           | <i>S. epidermidis</i>   | 5               | 5   | 5    | 7.5 | 12.5 | 10   |
|           | <i>E. coli</i>          | 7.5             | 7.5 | 7.5  | 10  | 12.5 | 12.5 |
|           | <i>P. aeruginosa</i>    | 65              | 70  | 70   | >80 | >80  | >80  |
|           | <i>C. albicans</i>      | 35              | 40  | 40   | 40  | 50   | 50   |
|           | <i>A. brasiliensis</i>  | 30              | 40  | 43   | 35  | 40   | 30   |

MBC and MFC values are expressed as mg/mL. B - bilberry extract; BP, bilberry extract with pectin; BPCD - bilberry extract with pectin and hydroxypropyl- $\beta$ -cyclodextrin (HP- $\beta$ -CD); C - chokeberry extract; CP - chokeberry extract with pectin; CPCD - chokeberry extract with pectin and HP- $\beta$ -CD.
